# Supplementary material
Source: publisher figshare collection journal article supplement (https://gsajournals.figshare.com/ndownloader/files/17033477)
Supplement: Supplementary file 1 [file 17033477]

## Sheet: All peptides
N	Unused	Total	%Cov (95)	Protein Accession	Precursor Protein	Contrib	Conf	Sequence	Count*	Modifications	dMass	Prec MW	Prec m/z	Theor MW	Theor m/z	Theor z	Sc	Spectrum	Time	Precursor Signal
1	50.56	50.56	71.43	Contig522	Pedal peptide a-1	2	99	GFDKISHSSGFSA	42		-0.0458842	1338.57	447.199	1338.62	447.214	3	11	34.1.1.1585.3	22.2325	11881
1	50.56	50.56	71.43	Contig522	Pedal peptide a-1	2	99	GFDKISHSSGFSAFN	206		-0.0191641	1599.71	534.245	1599.73	534.251	3	15	10.1.1.1689.8	25.8423	30670
1	50.56	50.56	71.43	Contig522	Pedal peptide a-1	2	99	GLDSISHFSDMDDF	47	Amidated@C-term	0.00744722	1583.66	792.839	1583.66	792.835	2	18	18.1.1.1769.2	30.1902	3453
1	50.56	50.56	71.43	Contig522	Pedal peptide a-1	0	83.71	GLDSISHFSDMDDF	47		0.0403994	1584.68	793.348	1584.64	793.327	2	12	25.1.1.1770.3	30.2747	778
1	50.56	50.56	71.43	Contig522	Pedal peptide a-1	2	99	PFDKIGDGTGISG	88		0.00336789	1262.62	632.316	1262.61	632.314	2	11	6.1.1.1630.7	23.4505	1221
1	50.56	50.56	71.43	Contig522	Pedal peptide a-1	2	99	PFDKIGDGTGISGFA	205		0.00599448	1480.73	741.37	1480.72	741.367	2	18	7.1.1.1673.14	28.4967	15416
1	50.56	50.56	71.43	Contig522	Pedal peptide a-1	1.19382	93.64	PFDSIAAGSDLSG	23		-0.00989443	1235.56	618.786	1235.57	618.791	2	8	31.1.1.1696.9	25.7009	7581
1	50.56	50.56	71.43	Contig522	Pedal peptide a-1	2	99	PFDSIAAGSDLSGFA	57		0.0140945	1453.69	727.851	1453.67	727.844	2	17	5.1.1.1740.6	30.7668	6484
1	50.56	50.56	71.43	Contig522	Pedal peptide a-1	2	99	PFDSIAAGSGISGFA	54		0.00114115	1395.67	698.841	1395.67	698.841	2	17	4.1.1.1739.3	30.5208	11523
1	50.56	50.56	71.43	Contig522	Pedal peptide a-1	2	99	PFDSIASGGGMAG	24		-0.0257105	1165.48	583.748	1165.51	583.761	2	8	31.1.1.1669.12	24.3604	10909
1	50.56	50.56	71.43	Contig522	Pedal peptide a-1	0.617983	99	PFDSIASGGGMAGF	155	Dethiomethyl(M)@11	-0.00335128	1264.57	633.292	1264.57	633.293	2	10	37.1.1.1660.7	23.5076	10479
1	50.56	50.56	71.43	Contig522	Pedal peptide a-1	2	99	PFDSIASGGGMAGFA	149		0.00938676	1383.62	692.818	1383.61	692.814	2	18	7.1.1.1709.2	29.9362	2184
1	50.56	50.56	71.43	Contig522	Pedal peptide a-1	2	99	PFDSIASGRGMAG	426	Oxidation(M)@11	-0.0043252	1280.58	641.296	1280.58	641.298	2	9	6.1.1.1624.5	23.1349	22420
1	50.56	50.56	71.43	Contig522	Pedal peptide a-1	0	99	PFDSIASGRGMAG	426		-1.99879	1262.59	632.301	1264.59	633.301	2	12	34.1.1.1607.10	23.3652	23752
1	50.56	50.56	71.43	Contig522	Pedal peptide a-1	2	99	PFDSIASGRGMAGFA	362		0.00932929	1482.7	742.358	1482.69	742.354	2	16	4.1.1.1703.21	28.7446	32539
1	50.56	50.56	71.43	Contig522	Pedal peptide a-1	2	99	PFDSIASGRGMSG	471		-0.00371485	1280.58	641.296	1280.58	641.298	2	13	6.1.1.1618.7	22.8366	22420
1	50.56	50.56	71.43	Contig522	Pedal peptide a-1	2	99	PFDSIASGRGMSGFA	245		0.00220763	1498.69	750.352	1498.69	750.351	2	13	4.1.1.1688.19	27.9926	34899
1	50.56	50.56	71.43	Contig522	Pedal peptide a-1	2	99	PFDSIGSGGFST	105		-0.0188566	1170.5	586.258	1170.52	586.267	2	10	12.1.1.1687.9	26.3011	8524
1	50.56	50.56	71.43	Contig522	Pedal peptide a-1	2	99	PFDSISAGRGMSG	382		-0.00749903	1280.57	641.294	1280.58	641.298	2	11	5.1.1.1582.11	22.8937	22009
1	50.56	50.56	71.43	Contig522	Pedal peptide a-1	0	92.25	PFDSISAGRGMSGFV	115	Oxidation(M)@11	-0.0100434	1542.7	515.242	1542.71	515.245	3	8	4.1.1.1712.8	29.1685	2363
1	50.56	50.56	71.43	Contig522	Pedal peptide a-1	0	94.2	PFDSISAGRGMSGFV	115	Oxidation(R)@9	0.0185954	1542.73	772.373	1542.71	772.364	2	12	4.1.1.1711.16	29.1376	8096
1	50.56	50.56	71.43	Contig522	Pedal peptide a-1	2	99	PFDSISAGRGMSGFV	115		0.00313407	1526.72	764.368	1526.72	764.367	2	12	4.1.1.1726.14	29.8874	11807
1	50.56	50.56	71.43	Contig522	Pedal peptide a-1	0.00480371	86.84	PFDSISGSSAFS	85	Phospho(S)@12	0.0732181	1280.57	641.292	1280.5	641.255	2	12	17.1.1.1736.2	23.2246	4920
1	50.56	50.56	71.43	Contig522	Pedal peptide a-1	2	99	PFDSISGSSAFSDFA	50		0.022068	1533.68	767.85	1533.66	767.838	2	17	4.1.1.1758.4	31.4693	3072
1	50.56	50.56	71.43	Contig522	Pedal peptide a-1	2	99	PFDSISQGAGMAGFA	105		-0.000993632	1454.65	728.332	1454.65	728.332	2	19	4.1.1.1720.14	29.5847	17312
1	50.56	50.56	71.43	Contig522	Pedal peptide a-1	2	99	PFDSISSGGGMAGFA	106		-0.00115286	1399.61	700.811	1399.61	700.811	2	19	10.1.1.1755.4	29.1159	3903
1	50.56	50.56	71.43	Contig522	Pedal peptide a-1	2	99	PLDSISAGSGLSGFA	101		0.00827666	1377.69	689.85	1377.68	689.846	2	19	7.1.1.1701.2	29.6874	3555
1	50.56	50.56	71.43	Contig522	Pedal peptide a-1	2	99	SFDKIAHGGFASFN	171		-0.0275909	1496.68	499.9	1496.7	499.909	3	10	22.1.1.1649.8	26.9944	36223
1	50.56	50.56	71.43	Contig522	Pedal peptide a-1	2	99	SFDSINAGSGLSGFA	69		0.00568695	1428.66	715.336	1428.65	715.333	2	18	9.1.1.1784.3	29.7576	2114
1	50.56	50.56	71.43	Contig522	Pedal peptide a-1	2	99	SFDSINKGSGLSGFM	71		0.0105069	1545.72	773.869	1545.71	773.864	2	22	5.1.1.1724.5	29.982	5934
2	28.2	28.2	55.26	Contig35	PKYMDT	1.79588	99	ADEGRLDEASLA	521		-0.021236	1245.56	623.788	1245.58	623.799	2	11	37.1.1.1631.2	22.0314	5500
2	28.2	28.2	55.26	Contig35	PKYMDT	1.5376	98.29	ADEGRLDEASLAA	115		-0.01355	1316.61	659.311	1316.62	659.318	2	8	44.1.1.1578.6	22.0132	9399
2	28.2	28.2	55.26	Contig35	PKYMDT	2	99	ADEGRLDEASLAAE	245		-0.0112212	1445.65	723.833	1445.66	723.839	2	13	12.1.1.1600.6	21.9521	8596
2	28.2	28.2	55.26	Contig35	PKYMDT	2	99	DEGRLDEASLA	113		-0.025382	1174.52	588.268	1174.55	588.281	2	9	28.1.1.1590.6	21.5929	8410
2	28.2	28.2	55.26	Contig35	PKYMDT	2	99	DEGRLDEASLAAE	47		-0.0104844	1374.62	688.315	1374.63	688.32	2	9	25.1.1.1577.10	22.0811	5255
2	28.2	28.2	55.26	Contig35	PKYMDT	1.00877	94.03	LPADEGRLDE	89		-0.0112009	1113.52	557.767	1113.53	557.772	2	10	5.1.1.1494.2	19.1873	2680
2	28.2	28.2	55.26	Contig35	PKYMDT	2	99	LPADEGRLDEAS	294		-0.0105189	1271.59	636.802	1271.6	636.807	2	10	21.1.1.1506.3	19.132	3489
2	28.2	28.2	55.26	Contig35	PKYMDT	2	99	LPADEGRLDEASL	142		-0.00400673	1384.68	693.347	1384.68	693.349	2	11	8.1.1.1544.16	24.6062	12377
2	28.2	28.2	55.26	Contig35	PKYMDT	2	99	LPADEGRLDEASLA	898		0.00831796	1455.73	728.872	1455.72	728.868	2	17	4.1.1.1615.18	24.3395	269510
2	28.2	28.2	55.26	Contig35	PKYMDT	2	99	LPADEGRLDEASLAA	288		-0.00316107	1526.75	764.385	1526.76	764.386	2	13	36.1.1.1623.20	24.7787	60175
2	28.2	28.2	55.26	Contig35	PKYMDT	2	99	LPADEGRLDEASLAAE	708		0.00954369	1655.81	828.912	1655.8	828.907	2	16	10.1.1.1661.21	24.4879	142098
2	28.2	28.2	55.26	Contig35	PKYMDT	0.0101054	89.24	PADEGRLDEASLAAEKRPKYMDTRQEDFEMV	1		3.04043	3599.73	900.939	3596.69	900.179	4	10	28.1.1.1668.18	25.4766	15919
2	28.2	28.2	55.26	Contig35	PKYMDT	2	99	PKYMDTRQEDFEMVKQTVLIAMEELVQEGKLNPSVLAGGQVKPVE	1	Deamidated(Q)@27; Deamidated(N)@32; Deamidated(Q)@40	0.164859	5076.7	847.125	5076.54	847.097	6	19	18.1.1.2622.2	41.2366	1174
2	28.2	28.2	55.26	Contig35	PKYMDT	2	99	SGLPADEGRLDEASLA	191		-0.00257164	1599.77	800.893	1599.77	800.894	2	15	28.1.1.1663.16	25.2315	65358
2	28.2	28.2	55.26	Contig35	PKYMDT	1.58503	98.46	SGLPADEGRLDEASLAAE	133		-0.00183419	1799.85	900.933	1799.85	900.934	2	11	34.1.1.1647.19	25.377	28435
2	28.2	28.2	55.26	Contig35	PKYMDT	1.72125	98.86	VQEGKLNPSVLAGGQVKPVE	3		-0.0211142	2048.11	683.709	2048.13	683.716	3	11	31.1.1.1698.13	25.8075	5206
3	10.3	10.3	40.59	Contig2960	LASGLVamide (Pedal peptide a-3)	0.501689	86.81	APFDPLANEL	1		-0.0178677	1085.52	543.768	1085.54	543.777	2	12	31.1.1.1910.2	31.9711	2213
3	10.3	10.3	40.59	Contig2960	LASGLVamide (Pedal peptide a-3)	2	99	APFDPLANELIE	28		-0.014764	1327.65	664.833	1327.67	664.84	2	10	15.1.1.1971.5	33.4211	7184
3	10.3	10.3	40.59	Contig2960	LASGLVamide (Pedal peptide a-3)	2	99	AYTPYRLFRYHTF	42		0.00232766	1733.87	578.964	1733.87	578.963	3	14	22.1.1.1696.4	29.3419	2210
3	10.3	10.3	40.59	Contig2960	LASGLVamide (Pedal peptide a-3)	0.492144	86.46	FDPLANELIE	2		-0.0138756	1159.56	580.788	1159.58	580.795	2	9	42.1.1.1779.5	31.5352	1863
3	10.3	10.3	40.59	Contig2960	LASGLVamide (Pedal peptide a-3)	0.000869459	86.6	FDPLASGLI	17	Amidated@C-term	-0.0230486	930.494	466.255	930.517	466.266	2	9	41.1.1.2109.3	32.4433	2484
3	10.3	10.3	40.59	Contig2960	LASGLVamide (Pedal peptide a-3)	1.16749	97.65	PFDPLASG	131		-0.0276864	802.358	402.187	802.386	402.2	2	7	16.1.1.1649.4	26.0213	5836
3	10.3	10.3	40.59	Contig2960	LASGLVamide (Pedal peptide a-3)	0.737549	93.14	PFDPLASGLI	43		-0.00214978	1028.55	515.283	1028.55	515.284	2	13	23.1.1.1942.2	33.8716	1440
3	10.3	10.3	40.59	Contig2960	LASGLVamide (Pedal peptide a-3)	1.23657	98.01	PFDRLASG	292		-0.0260458	861.408	431.712	861.434	431.725	2	8	16.1.1.1537.3	20.4331	2388
3	10.3	10.3	40.59	Contig2960	LASGLVamide (Pedal peptide a-3)	0.00261362	95.23	PFDRLASGLI	206	Amidated@C-term	-0.0147236	1086.6	544.309	1086.62	544.317	2	14	27.1.1.1748.2	29.0188	52433
3	10.3	10.3	40.59	Contig2960	LASGLVamide (Pedal peptide a-3)	2	99	TVADDVKDEGIDAFEEPKDLQ	9		0.00636722	2333.1	778.706	2333.09	778.704	3	13	11.1.1.1726.11	27.9865	3932
4	6.54	6.54	20.43	Contig60	Enterin-1	1.08619	97.55	FVYYALGKNKNSGNTP	55		-0.0207825	1771.87	591.63	1771.89	591.637	3	9	12.1.1.1643.10	24.0938	21335
4	6.54	6.54	20.43	Contig60	Enterin-1	0.404504	84.51	LVNPFVYYALG	4		-0.0146183	1254.65	628.332	1254.66	628.34	2	12	36.1.1.2225.2	37.251	2191
4	6.54	6.54	20.43	Contig60	Enterin-1	0	99	LVNPFVYYALGKNKNSGNTP	265	Deamidated(N)@3	0.0399404	2196.16	733.061	2196.12	733.048	3	16	5.1.1.1799.2	32.2704	10918
4	6.54	6.54	20.43	Contig60	Enterin-1	2	99	LVNPFVYYALGKNKNSGNTP	265		0.0287777	2195.17	732.729	2195.14	732.72	3	19	4.1.1.1794.2	32.3335	31324
4	6.54	6.54	20.43	Contig60	Enterin-1	0.645892	92.41	MPIELES	436		-0.0316994	817.357	409.686	817.389	409.702	2	8	24.1.1.1625.4	24.9816	17223
4	6.54	6.54	20.43	Contig60	Enterin-1	2	99	MPTAFQTRLSPKVGRWFV	18	Amidated@C-term	-0.0205134	2119.13	530.79	2119.15	530.795	4	18	31.1.1.1881.2	31.6077	2741
5	4.01	4.01	18.52	Contig409	NKY	2	99	NSPREINLDNSPIT	230		0.00824398	1568.79	785.401	1568.78	785.397	2	13	4.1.1.1623.20	24.7392	31386
5	4.01	4.01	18.52	Contig409	NKY	2	99	RTIDQSQAALSGVSRV	15		-0.0242603	1686.88	563.3	1686.9	563.308	3	9	26.1.1.1649.8	23.3654	1030
6	3.65	3.65	16.07	Contig174	sCAP	1.61979	99	MNYLAFPR	15		-0.0177052	1010.48	506.249	1010.5	506.258	2	9	37.1.1.1752.6	28.0668	4611
6	3.65	3.65	16.07	Contig174	sCAP	0.0172766	99	MNYLAFPRM	284	Amidated@C-term	-0.0156415	1140.54	571.278	1140.56	571.286	2	10	3.1.1.1972.5	30.7257	31371
6	3.65	3.65	16.07	Contig174	sCAP	2	99	SGYLAFPR	107		-0.0253829	909.445	455.73	909.471	455.743	2	11	37.1.1.1710.4	25.9808	9428
6	3.65	3.65	16.07	Contig174	sCAP	0.00174066	95.55	SGYLAFPRM	379	Amidated@C-term	-0.0172157	1039.51	520.762	1039.53	520.771	2	10	42.1.1.1732.6	29.1936	153431
7	2.79	2.79	10.47	Contig32	LFRFamide	0.435334	93.06	GGNDDMWVPVNEDGQDA	146		0.0128428	1817.73	909.872	1817.72	909.865	2	8	27.1.1.1714.13	27.3711	11573
7	2.79	2.79	10.47	Contig32	LFRFamide	0	99	LGAKEEQDSEAAVAAPSEHH	233	Deamidated(Q)@7	-0.0199667	2075.92	519.987	2075.94	519.992	4	16	11.1.1.1519.3	17.8748	5077
7	2.79	2.79	10.47	Contig32	LFRFamide	2	99	LGAKEEQDSEAAVAAPSEHH	233		-0.0173964	2074.94	519.742	2074.96	519.746	4	18	5.1.1.1469.2	18.0949	7133
7	2.79	2.79	10.47	Contig32	LFRFamide	0.345823	90.45	NFHWGRETEE	255		-0.004357	1303.55	652.784	1303.56	652.786	2	6	8.1.1.1491.8	21.9397	3647
8	2	2	20	Contig1759	Cerebrin	2	99	NGGTLDSLFNLPDLSDN	11	Amidated@C-term	0.0196363	1789.87	895.941	1789.85	895.931	2	21	16.1.1.2008.2	35.8458	2891
9	1.94	1.94	4.054	Contig9	APGWamide-1	0.219683	89.41	DILEDYT	46		-0.0211541	867.365	434.69	867.386	434.7	2	6	7.1.1.1619.9	25.7895	4895
9	1.94	1.94	4.054	Contig9	APGWamide-1	1.63827	99	TLDILEDYT	104		-0.0142858	1081.5	541.759	1081.52	541.766	2	14	37.1.1.1848.2	30.9121	3495
10	0.27	0.27	14.9	Contig268	Buccalin	0.000434512	93.86	AMDKFGFASQL	45	Amidated@C-term	-0.0144904	1212.58	607.298	1212.6	607.305	2	14	37.1.1.1760.2	28.4746	12451
10	0.27	0.27	14.9	Contig268	Buccalin	0	92.45	AMDKFGFASQL	45		-0.999849	1212.58	607.297	1213.58	607.797	2	11	40.1.1.1714.13	28.2961	38489
10	0.27	0.27	14.9	Contig268	Buccalin	0.000434512	92.76	GIDNLGFAGQL	25	Amidated@C-term	-0.0117048	1102.57	552.29	1102.58	552.296	2	14	23.1.1.1725.2	29.7827	2616
10	0.27	0.27	14.9	Contig268	Buccalin	0.00217692	98.89	GMDNLGFAGQL	70	Amidated@C-term	-0.0170757	1120.52	561.265	1120.53	561.274	2	15	25.1.1.1722.3	29.2555	3850
10	0.27	0.27	14.9	Contig268	Buccalin	0.00174066	98.61	GVDPMAFRGSI	223	Amidated@C-term	-0.0207811	1147.56	574.787	1147.58	574.798	2	11	27.1.1.1714.8	27.3545	17582
10	0.27	0.27	14.9	Contig268	Buccalin	0.00261362	99	GVDSLGFAGQL	55	Amidated@C-term	-0.015063	1061.54	531.775	1061.55	531.783	2	15	7.1.1.1682.2	28.9083	3308
10	0.27	0.27	14.9	Contig268	Buccalin	0	97.81	GVDSLGFAGQL	55		-1.00408	1061.53	531.773	1062.53	532.275	2	11	19.1.1.1722.5	28.8282	7489
10	0.27	0.27	14.9	Contig268	Buccalin	0.0851282	99	QIDSRMFGARL	93	Gln->pyro-Glu@N-term; Amidated@C-term	-0.0127015	1274.64	638.329	1274.66	638.335	2	16	12.1.1.1738.6	28.8372	3667
10	0.27	0.27	14.9	Contig268	Buccalin	0.000434512	91.77	RFDPILFGGRL	5	Amidated@C-term	0.00185766	1288.74	645.378	1288.74	645.378	2	11	4.1.1.1761.5	31.6082	882
10	0.27	0.27	14.9	Contig268	Buccalin	0.00130484	81.48	RMDNLGFAGQL	80		-1.00249	1219.59	610.805	1220.6	611.306	2	9	40.1.1.1701.12	27.6482	15266
10	0.27	0.27	14.9	Contig268	Buccalin	0	99	RMDSYGFNAQL	69	Amidated@C-term	-0.0085493	1299.59	650.804	1299.6	650.809	2	10	21.1.1.1647.13	25.5644	28317
10	0.27	0.27	14.9	Contig268	Buccalin	0.170696	99	RMDSYGFNAQL	69		-0.979992	1299.61	650.811	1300.59	651.301	2	12	7.1.1.1611.13	25.4045	28223
* - count is equivalent to total number of peptide spectrum matches for each sequence and does not account for modifications

## Sheet: Quantified neuropeptide data
	Neuropeptide	Sex	Reproductive Year	m/z	RT	z	Response per mg of CNS tissue
Precursor							VGI 0					VGI 1.5					CGI 2.5
							Rep 1	Rep 2	Rep 3	Average	SE	Rep 1	Rep 2	Rep 3	Average	SE	Rep 1	Rep 2	Rep 3	Average	SE
sCAPb	MNYLAFPRM	Female	3	571.336	30.63	2	64537.8	58027.6	45518.1	56027.9	5580.81	57759	40118.2	59765.3	52547.5	6241.57	65616	49783.4	48376.6	54592	5526.95
sCAPb	MNYLAFPRM	Male	3	571.328	30.66	2	22080.8	9635.2	45637	25784.3	10556.5	49506.2	40555.3	44290	44783.8	2595.66	32161.4	48231.1	50839	43743.8	5839.96
sCAPb	MNYLAFPRM	Female	1	571.284	30.21	2	4682.27	9710.55	12778.9	9057.24	2360.01	13609.2	9389.21	10784.8	11261.1	1241.26	5475.32	9492.38	0	7483.85	2008.53
sCAPb	MNYLAFPRM	Male	1	571.284	30.21	2	4796.83	9938.22	13096.6	9277.21	2418.62	14439.8	11177.8	8576.34	11398	1696.2	10601.5	14886.2	3492.26	9659.98	3322.67
sCAPa	SGYLAFPRM	Female	3	520.809	28.8	2	103072	101842	77346	94086.8	8377.92	79514.3	57296.8	90634.8	75815.3	9799.96	98361.3	82003.1	83804.2	88056.2	5178.72
sCAPa	SGYLAFPRM	Male	3	520.805	28.88	2	38938.6	1739.77	73444.5	38040.9	20704.2	73568.8	79799.8	76175	76514.5	1806.74	65981.8	50811.4	76222.9	64338.7	7381.54
sCAPa	SGYLAFPRM	Female	1	520.767	28.52	2	5508.45	12454.7	12569.6	10177.6	2334.8	17257.4	13977.1	14207.5	15147.3	1057.15	6789.19	12671.4	0	9730.31	2941.11
sCAPa	SGYLAFPRM	Male	1	520.767	28.52	2	5643.22	12746.7	12882.1	10424	2390.71	16994.2	15782.9	15145.9	15974.3	542.069	14845.4	17967.6	5588.33	12800.4	3716.99
Cerebrin	NGGTLDSLFNLPDLSDN	Female	1	895.945	35.81	2	0	3164.85	1899.37	2532.11	632.74	2512.33	2403.3	2283.65	2399.76	66.038	0	0	0	0	0
Cerebrin	NGGTLDSLFNLPDLSDN	Male	1	895.945	35.81	2	0	3239.05	1946.59	2592.82	646.23	3164.73	2313.65	2713.13	2730.5	245.84	2648.99	2728.78	66.2713	1814.68	874.509
Allotropin	GFRANSADRVAHGY	Female	1	507.249	17.89	3	227.77	122.97	90.15	146.963	41.4993	68.39	157.38	94.48	106.75	26.4116	229	176.84	0	202.92	26.08
Allotropin	GFRANSADRVAHGY	Male	1	507.249	17.89	3	233.339	125.853	92.3923	150.528	42.517	143.568	144.954	102.3	130.274	13.9928	79.0556	108.297	215.634	134.329	41.5196
Buccalin	AMDKFGFASQL	Female	3	607.364	28.53	2	23888.4	24745.2	18660.9	22431.5	1901.45	18412.4	12300.1	17083.5	15932	1856.01	24311.9	17837.2	22166.8	21438.6	1904.22
Buccalin	AMDKFGFASQL	Male	3	607.351	28.67	2	5803.9	544.002	13249.3	6532.41	3685.76	11419.9	10788	19669.5	13959.2	2860.99	10641.9	8617.98	17665.6	12308.5	2741.55
Buccalin	AMDKFGFASQL	Female	1	607.304	28.15	2	1404.41	5654.44	4408.99	3822.61	1261.42	5019.18	4686.46	4300.6	4668.75	207.625	1133.95	2881.86	0	2007.91	873.955
Buccalin	AMDKFGFASQL	Male	1	607.304	28.15	2	1438.77	5787.01	4518.6	3914.79	1291.02	5814.97	4121.64	5227.68	5054.76	496.409	4947.81	5078.04	1557.05	3860.97	1152.57
Buccalin	GVDPMAFRGSI	Female	3	574.84	27.37	2	20993.6	21272.1	12508.5	18258.1	2875.9	10193.5	8466.58	11952.1	10204	1006.19	13195.4	11520.2	14222	12979.2	787.397
Buccalin	GVDPMAFRGSI	Male	3	574.836	27.26	2	5149.17	0	9810.12	7479.65	2330.47	8377	8126.38	13034.4	9845.93	1595.88	9697.24	4532.6	11781.6	8670.48	2154.66
Buccalin	GVDPMAFRGSI	Female	1	574.793	26.88	2	960.47	2160.07	1478.79	1533.11	347.358	2818.9	2287.77	2371.29	2492.65	164.895	966.07	2087.14	0	1526.61	560.535
Buccalin	GVDPMAFRGSI	Male	1	574.793	26.88	2	983.97	2210.72	1515.55	1570.08	355.179	2916.54	2350.34	2858.44	2708.44	179.833	2742.51	2246.32	1134.42	2041.08	475.423
Buccalin	RFDPILFGGRL	Female	3	645.445	31.95	2	8227.7	6143.53	6212.47	6861.23	683.523	8732	7959.89	8204.9	8298.93	227.792	7683.67	5721.89	8253.42	7219.66	766.735
Buccalin	RFDPILFGGRL	Male	3	645.428	32	2	3199.56	1127.95	5688.7	3338.73	1318.41	4987.02	5029.31	7879.65	5965.33	957.238	4961.96	5146.47	6387.35	5498.59	447.559
Buccalin	RFDPILFGGRL	Female	1	645.376	31.35	2	461.57	1553.53	1153.44	1056.18	318.951	1187.55	916.47	1002.9	1035.64	79.9479	953.83	1494.99	0	1224.41	270.58
Buccalin	RFDPILFGGRL	Male	1	645.376	31.35	2	472.859	1589.96	1182.11	1081.64	326.368	1275.27	884.027	923.497	1027.6	124.36	1123.76	1177	703.701	1001.49	149.683
Buccalin	RMDNLGFAGQL	Female	3	610.87	27.5	2	18445.7	16951.7	12404.9	15934.1	1816.53	12413	9649.66	11793.2	11285.3	837.157	13709.8	11895	13318.7	12974.5	551.438
Buccalin	RMDNLGFAGQL	Male	3	610.857	27.62	2	4858.74	0	9843.48	7351.11	2492.37	9316.51	11296.7	12481.9	11031.7	923.322	8759.73	4570	13507.9	8945.89	2581.84
Buccalin	RMDNLGFAGQL	Female	1	610.812	27.43	2	0	0	1544.44	1544.44	0	0	0	0	0	0	0	0	0	0	0
Buccalin	RMDNLGFAGQL	Male	1	610.812	27.43	2	0	0	1582.83	1582.83	0	0	0	0	0	0	0	0	0	0	0
LASGLVamide (Pedal peptide a-3)	APFDPLANELIE	Female	3	664.915	33.36	2	1221.93	514.2	1104	946.71	218.918	2959.46	3803.91	1352.12	2705.17	719.102	3431	9117.96	14443.3	8997.42	3179.55
LASGLVamide (Pedal peptide a-3)	APFDPLANELIE	Male	3	664.9	33.35	2	0	0	237.408	237.408	0	0	261.66	512.258	386.959	125.299	5508.11	11290.8	4802.95	7200.63	2055.21
LASGLVamide (Pedal peptide a-3)	APFDPLANELIE	Female	1	664.842	33.21	2	544.52	6494.65	3270.6	3436.59	1719.66	4251.62	4369.14	4403.55	4341.44	45.9938	1964.68	1653.61	0	1809.14	155.535
LASGLVamide (Pedal peptide a-3)	APFDPLANELIE	Male	1	664.842	33.21	2	557.838	6646.92	3351.91	3518.89	1759.75	5589.8	1811.69	3192.71	3531.4	1103.72	2755.84	5513.3	2132.4	3467.18	1038.77
LASGLVamide (Pedal peptide a-3)	AYTPYRLFRYHTF	Female	1	578.962	29.18	3	287.38	3086.35	3247.07	2206.93	960.897	3293.84	2303.57	2594.92	2730.78	293.826	355.21	414.45	0	384.83	29.62
LASGLVamide (Pedal peptide a-3)	AYTPYRLFRYHTF	Male	1	578.962	29.18	3	294.408	3158.71	3327.79	2260.31	984.16	3755.95	2187.12	2813.16	2918.75	455.95	2545.85	3057.95	250.285	1951.36	863.291
LASGLVamide (Pedal peptide a-3)	FDPLASGLI	Female	3	466.289	32.47	2	4082.92	3937.19	3720.48	3913.53	105.294	3171.5	3102.58	3197.92	3157.34	28.4204	7417.41	5135.32	7108.78	6553.84	714.834
LASGLVamide (Pedal peptide a-3)	FDPLASGLI	Male	3	466.287	32.56	2	3001.58	650.566	3233	2295.05	824.951	2197.41	2050.56	5706.5	3318.15	1194.92	3640.11	4222.6	4757.32	4206.67	322.607
LASGLVamide (Pedal peptide a-3)	FDPLASGLI	Female	1	466.258	32.34	2	635.57	2165.96	1836.7	1546.08	465.07	1814.08	1335.84	1957.65	1702.52	187.968	1046.27	1297.01	0	1171.64	125.37
LASGLVamide (Pedal peptide a-3)	FDPLASGLI	Male	1	466.258	32.34	2	651.124	2216.74	1882.36	1583.41	476.032	2557.92	1451.03	2111.51	2040.15	321.518	1905.39	1986.76	1257.17	1716.44	230.832
LASGLVamide (Pedal peptide a-3)	PFDPLASGLI	Female	3	514.83	33.76	2	22084.9	17063.6	14008.3	17718.9	2354.42	13803.9	9056.02	13795.5	12218.5	1581.22	19380	21990.1	33839.1	25069.7	4448.94
LASGLVamide (Pedal peptide a-3)	PFDPLASGLI	Male	3	514.822	33.85	2	5652.45	565.964	7899.47	4705.96	2169.25	8699.85	8678.38	24074.5	13817.6	5128.45	12214.6	20715.8	27526	20152.1	4429.01
LASGLVamide (Pedal peptide a-3)	PFDPLASGLI	Female	1	514.789	33.69	2	5362.19	14019.7	14661.8	11347.9	2998.58	13244.6	12117.4	13069.5	12810.5	350.217	6688.75	10760.2	0	8724.47	2035.72
LASGLVamide (Pedal peptide a-3)	PFDPLASGLI	Male	1	514.789	33.69	2	5493.38	14348.3	15026.3	11622.7	3070.89	18131.1	11209.7	16535.3	15292.1	2092.49	12088.2	13855	6328.7	10757.3	2272.28
LASGLVamide (Pedal peptide a-3)	PFDRLASGLI	Female	3	544.36	29.18	2	64819.5	59703.2	50520.4	58347.7	4183.08	47797.2	33652.9	53673.3	45041.1	5941.42	61780.2	56175.9	63313.1	60423.1	2169.21
LASGLVamide (Pedal peptide a-3)	PFDRLASGLI	Male	3	544.351	29.31	2	19998.8	722.117	38668.8	19796.6	10954.7	36560.3	39550.1	58470.8	44860.4	6859.73	34220.9	40883.7	53592.2	42899	5682.07
LASGLVamide (Pedal peptide a-3)	PFDRLASGLI	Female	1	544.313	28.88	2	10456.9	19580.5	15021.5	15019.6	2633.75	21000.1	15840.4	15192.3	17344.3	1837.47	10739.9	18788.8	0	14764.4	4024.44
LASGLVamide (Pedal peptide a-3)	PFDRLASGLI	Male	1	544.313	28.88	2	10712.8	20039.6	15394.9	15382.4	2692.42	25774.8	14176.6	18702.8	19551.4	3374.89	16067.5	19960	10350.2	15459.2	2790.75
LFRFamide	NFHWGRETEE	Female	3	652.853	21.33	2	34906.5	48881.3	35042.6	39610.1	4635.76	32918.9	24524	39371.7	32271.5	4298.37	54508.2	57216.5	62365.8	58030.2	2304.49
LFRFamide	NFHWGRETEE	Male	3	652.841	21.44	2	15812.2	0	28986	22399.1	6586.9	25749.6	29027.5	38067.4	30948.2	3683.25	47011.2	5343.06	55283.6	35879.3	15453.7
PKYMDT	LPADEGRLDEASLAA	Female	3	764.468	25.08	2	34933.9	36089.8	18174	29732.6	5788.92	16558.5	15113.6	18768.6	16813.5	1062.8	16547.4	23917.3	29975	23479.9	3882.39
PKYMDT	LPADEGRLDEASLAA	Male	3	764.457	24.98	2	10291.2	0	13907.8	12099.5	1808.3	17617.4	20597.5	24036.1	20750.3	1854.51	16294.1	12576.1	28454.1	19108.1	4794.69
PKYMDT	LPADEGRLDEASLAA	Female	1	764.391	24.61	2	1701.59	2377.85	2782.06	2287.17	315.183	2641.73	3089.48	2680.88	2804.03	143.172	2772.86	4970.76	0	3871.81	1098.95
PKYMDT	LPADEGRLDEASLAA	Male	1	764.391	24.61	2	1743.22	2433.6	2851.22	2342.68	323.067	2876	2357.49	3027.43	2753.64	202.841	2978.4	2991.32	2951.61	2973.78	11.6933
NKY	NSPREINLDNSPIT	Female	3	785.502	24.79	2	36891.1	37969.6	26049.2	33636.6	3806.47	19698.3	17811.5	26928.2	21479.3	2778.34	49082.3	44006.9	44692	45927.1	1589.96
NKY	NSPREINLDNSPIT	Male	3	785.481	24.85	2	8575.83	0	16138.6	12357.2	3781.37	18721.5	22501.1	31050.4	24091	3646.76	33317.3	10962.8	40679.5	28319.9	8934.96
NKY	NSPREINLDNSPIT	Female	1	785.404	24.7	2	1424.46	1563.46	1819.81	1602.58	115.791	2073.75	1841.76	1435.5	1783.67	186.522	2103.83	2476.73	0	2290.28	186.45
NKY	NSPREINLDNSPIT	Male	1	785.404	24.7	2	1459.31	1600.12	1865.05	1641.49	118.94	1814.15	1850.9	1803.6	1822.88	14.3348	1386.18	1645.71	1758.99	1596.96	110.346
Pedal peptide a-1	GLDSISHFSDMDDF	Female	3	792.942	30.54	2	7489.27	3299.96	1823.82	4204.35	1696.84	1501.26	2808.38	3332.95	2547.53	544.612	1884.87	3060.23	4330.68	3091.93	706.222
Pedal peptide a-1	GLDSISHFSDMDDF	Male	3	792.911	30.64	2	0	0	1772.29	1772.29	0	3855.46	4532.56	4370.1	4252.7	204.085	2652.49	6258.77	4045.08	4318.78	1050
Pedal peptide a-1	GLDSISHFSDMDDF	Female	1	792.843	30.06	2	0	2854.98	3005.85	2930.41	75.435	3631.99	2825.87	3808.76	3422.21	302.503	312.92	394.07	0	353.495	40.575
Pedal peptide a-1	GLDSISHFSDMDDF	Male	1	792.843	30.06	2	0	2921.91	3080.58	3001.25	79.3346	4335.58	2906.9	3701.14	3647.87	413.283	3656.23	4070.01	300.617	2675.62	1193.49
Pedal peptide a-1	PFDSIAAGSDLSGFA	Female	1	727.848	30.75	2	589.39	2997	2877.12	2154.5	783.321	3670.9	2840.51	3462.99	3324.8	249.472	771.43	502.34	0	636.885	134.545
Pedal peptide a-1	PFDSIAAGSDLSGFA	Male	1	727.848	30.75	2	603.812	3067.27	2948.64	2206.57	802.112	7716.67	5202.49	3572.38	5497.18	1205.39	6356.13	4017.83	482.226	3618.73	1707.35
Pedal peptide a-1	PFDSIAAGSGISGFA	Female	3	698.923	30.9	2	7669.7	2461.5	1492.94	3874.71	1917.98	1108.18	2206.62	2253.08	1855.96	374.13	2335.05	2964.4	5814.26	3704.57	1070.37
Pedal peptide a-1	PFDSIAAGSGISGFA	Male	3	698.901	30.99	2	342.809	0	1333.9	838.357	495.548	2174.73	2140.91	4451.01	2922.22	764.457	1902.36	8129.32	3662.86	4564.85	1853.28
Pedal peptide a-1	PFDSIASGGGMAGFA	Female	3	692.894	30.29	2	6153.08	2457.87	1316.29	3309.08	1459.69	909.498	1518.81	2057.87	1495.39	331.712	1919.57	3144.83	4512.86	3192.42	748.998
Pedal peptide a-1	PFDSIASGGGMAGFA	Male	3	692.873	30.34	2	0	0	1112.95	1112.95	0	981.326	1789.88	2586.74	1785.98	463.446	1150.58	5490.96	2860.69	3167.41	1262.31
Pedal peptide a-1	PFDSIASGGGMAGFA	Female	1	692.815	29.85	2	223.46	2122.52	1738.61	1361.53	579.727	2271.58	1974.1	2431.02	2225.57	133.893	585.32	0	0	585.32	0
Pedal peptide a-1	PFDSIASGGGMAGFA	Male	1	692.815	29.85	2	228.925	2172.28	1781.84	1394.35	593.512	3233	2328.43	2826.62	2796.02	261.574	2750.2	2506.7	201.386	1819.43	812.07
Pedal peptide a-1	PFDSIASGRGMSGFA	Female	3	750.447	28.25	2	25116.7	15147.5	10605.8	16956.6	4285.49	10437.2	8226.96	13507.2	10723.8	1530.99	15024.5	12458.8	19921.5	15801.6	2189.06
Pedal peptide a-1	PFDSIASGRGMSGFA	Male	3	750.42	28.38	2	3894.9	0	8973.41	6434.15	2539.25	11396	11363.2	15162.4	12640.6	1260.97	7360.42	18513.2	16140.5	14004.7	3392.02
Pedal peptide a-1	PFDSISAGRGMSGFV	Female	3	764.452	30.2	2	21923.7	12781	6777.61	13827.5	4403.51	7896.9	2638.7	12156.5	7564.03	2752.59	12695.1	11434.2	13850.4	12659.9	697.722
Pedal peptide a-1	PFDSISAGRGMSGFV	Male	3	764.439	30.2	2	941.249	0	7488.28	4214.76	3273.51	8760.76	8515.92	13532.6	10269.8	1632.96	5589.55	12933	9222.95	9248.49	2119.9
Pedal peptide a-1	PFDSISAGRGMSGFV	Female	1	764.374	29.63	2	526.43	911.01	440.53	625.99	144.651	3033.62	3018.11	3205.38	3085.7	60.0056	1134.4	2169.14	0	1651.77	517.37
Pedal peptide a-1	PFDSISAGRGMSGFV	Male	1	764.374	29.63	2	539.315	932.37	451.479	641.055	147.848	4244.91	2767.23	3143	3385.05	443.406	3453.46	3584.23	244.545	2427.41	1092.09
Pedal peptide a-1	PFDSISGSSAFSDFA	Male	3	767.91	31.84	2	1710.05	370.983	1341.24	1140.76	399.342	1811.18	1358.89	1945.69	1705.25	177.481	765.139	3487.09	2157.77	2136.66	785.829
Pedal peptide a-1	PFDSISGSSAFSDFA	Female	1	767.845	31.42	2	260	3109.26	2363.66	1910.97	853.085	3362.38	2473.14	3651.29	3162.27	354.515	1090.87	491.83	0	791.35	299.52
Pedal peptide a-1	PFDSISGSSAFSDFA	Male	1	767.845	31.42	2	266.366	3182.15	2422.42	1956.98	873.295	4496.41	3076.74	4088.12	3887.09	421.969	3545.45	4347.91	516.883	2803.41	1166.5
Pedal peptide a-1	PFDSISQGAGMAGFA	Female	3	728.922	29.95	2	22421.6	6934.71	4855.36	11403.9	5541.47	4960.03	5781.97	8475.51	6405.84	1061.69	7211.35	9917.58	15336.5	10821.8	2388.7
Pedal peptide a-1	PFDSISQGAGMAGFA	Male	3	728.396	30.07	2	622.422	0	4698.22	2660.32	2037.9	10256.3	12943.7	15521.5	12907.2	1520.06	6288.51	24278.4	12205.2	14257.3	5293.62
Pedal peptide a-1	PFDSISSGGGMAGFA	Female	3	700.88	29.61	2	13730	6972.47	5921.59	8874.69	2446.54	6848.55	4549.04	6561.25	5986.28	723.389	6742.66	7450.01	9600.93	7931.2	859.474
Pedal peptide a-1	PFDSISSGGGMAGFA	Male	3	700.869	29.58	2	129.024	0	3365.29	1747.15	1618.13	6904.92	6330.14	11539.5	8258.19	1649.03	4416.26	15718.5	9330.18	9821.66	3271.93
Pedal peptide a-1	PFDSISSGGGMAGFA	Female	1	700.812	29.04	2	205.23	2458.12	2169.89	1611.08	707.832	3168.45	3552.72	3685.09	3468.75	154.938	803.73	1242.38	0	1023.06	219.325
Pedal peptide a-1	PFDSISSGGGMAGFA	Male	1	700.812	29.04	2	210.255	2515.75	2223.84	1649.95	724.762	3347.39	2441.09	3244.83	3011.1	286.54	3417.71	3276.83	331.863	2342.13	1005.96
Pedal peptide a-1	PLDSISAGSGLSGFA	Female	3	689.913	30.18	2	12337.3	4963.49	3516.23	6939	2731.29	2704.84	2409.44	3141.09	2751.79	212.507	6161.41	11032.1	9550.61	8914.71	1441.55
Pedal peptide a-1	PLDSISAGSGLSGFA	Male	3	689.903	30.16	2	0	0	2381.43	2381.43	0	3031.73	2775.49	5379.64	3728.96	828.651	3071.78	7220.54	4312.43	4868.25	1229.47
Pedal peptide a-1	SFDSINAGSGLSGFA	Female	3	715.406	30.2	2	8212.08	3046.69	1260.04	4172.94	2084.39	2654.4	2286.76	3755.05	2898.73	441.114	2902.52	3184.13	4427.84	3504.83	468.609
Pedal peptide a-1	SFDSINAGSGLSGFA	Male	3	715.394	30.19	2	559.913	0	2102.81	1331.36	771.449	2400.54	2964.54	3953.2	3106.1	453.769	2127.3	6144.38	3759.4	4010.36	1166.4
Pedal peptide a-1	SFDSINAGSGLSGFA	Female	1	715.337	29.69	2	433.57	2060.48	1078.24	1190.76	473.006	2501.89	1586.17	1862.92	1983.66	271.151	638.27	504.13	0	571.2	67.07
Pedal peptide a-1	SFDSINAGSGLSGFA	Male	1	715.337	29.69	2	444.179	2108.79	1105.04	1219.34	483.918	3272	1716.41	2453.78	2480.73	449.263	2384.51	2271.89	573.898	1743.43	585.669
Pedal peptide a-1	SFDSINKGSGLSGFM	Female	3	773.948	30.42	2	10733.7	6448.43	4486.93	7223.03	1844.42	6558	6948.46	6038.9	6515.12	263.44	6731.3	5324.68	6547.05	6201.01	441.383
Pedal peptide a-1	SFDSINKGSGLSGFM	Male	3	773.937	30.4	2	1092.47	0	4800.65	2946.56	1854.09	6769.08	6189.82	7957.58	6972.16	520.315	3849.42	10826.1	6441.93	7039.16	2036.02
Pedal peptide a-1	SFDSINKGSGLSGFM	Female	1	773.87	29.9	2	559.07	2556.93	1061.56	1392.52	600.003	2936.9	2672.29	3156.21	2921.8	139.9	1022.12	1413.73	0	1217.92	195.805
Pedal peptide a-1	SFDSINKGSGLSGFM	Male	1	773.87	29.9	2	572.745	2616.87	1087.95	1425.86	613.8	3708.48	2493.64	3045.76	3082.63	351.179	2873.58	3490.65	374.073	2246.1	952.813
Pedal peptide a-1	SVDNAVESESDE	Female	3	640.821	16.66	2	2073.81	1747.69	1432.31	1751.27	185.196	1331.59	1244.31	2149.79	1575.23	288.383	1961.01	2291.6	2091.55	2114.72	96.1346
Pedal peptide a-1	SVDNAVESESDE	Male	3	640.808	16.44	2	1003.34	0	1155.72	1079.53	76.1936	1127.95	1180.95	1610.25	1306.38	152.701	2377.45	2487.18	1471.14	2111.92	321.953
Enterin-1	LVNPFVYYALGKNKNSGNTP	Female	3	732.818	32.76	3	42536.9	39677.6	32882.7	38365.7	2863.07	57715.6	40736.8	51906.5	50119.6	4982.12	47801	38740.6	45354.5	43965.3	2706.17
Enterin-1	LVNPFVYYALGKNKNSGNTP	Male	3	732.793	32.81	3	6223.81	710.612	25020.4	10651.6	7358.58	43745.5	53881.2	58015.7	51880.8	4239.15	25785	128879	47804.1	67489.5	31346.2
Enterin-1	LVNPFVYYALGKNKNSGNTP	Female	1	732.731	32.21	3	8619.6	28304.6	22720.7	19881.6	5857.2	26922.8	24708.7	30778.4	27470	1773.4	15484.8	16324	0	15904.4	419.585
Enterin-1	LVNPFVYYALGKNKNSGNTP	Male	1	732.731	32.21	3	8830.49	28968.2	23285.6	20361.4	5994.3	39769.6	25898.1	37555.4	34407.7	4302.56	35001.2	33436	5297.28	24578.2	9651.03
Enterin-1	MPTAFQTRLSPKVGRWFV	Female	1	530.798	31.4	4	100.53	9546.59	8580.81	6075.98	3000.7	10329.1	11091.1	9954.9	10458.4	334.291	1187.84	1019.5	0	1103.67	84.17
Enterin-1	MPTAFQTRLSPKVGRWFV	Male	1	530.798	31.4	4	102.988	9770.41	8794.14	6222.51	3072.71	11111.6	9574.72	9876.34	10187.6	470.168	9988.9	11029.1	523.127	7180.38	3342.14
APGW-amide	TLDILEDYT	Female	3	541.807	30.95	2	8507.91	4764.61	4061.71	5778.08	1379.92	3691.8	4147.66	4474.15	4104.54	226.872	4362.08	6340.55	10323.5	7008.72	1753.05
APGW-amide	TLDILEDYT	Male	3	541.798	31.05	2	1271.27	1066.8	3054.25	1797.44	631.171	4853.9	3291.85	6494.18	4879.98	924.523	3105.93	10342.7	5481	6309.89	2129.8
APGW-amide	TLDILEDYT	Female	1	541.762	30.74	2	804.33	12556.2	11086.6	8149.05	3696.78	10756.3	12142	12042.1	11646.8	446.164	1262.14	909.19	0	1085.66	176.475
APGW-amide	TLDILEDYT	Male	1	541.762	30.74	2	824.014	12850.6	11362.2	8345.61	3785.26	10765.4	9010.41	9452.81	9742.87	526.968	10092.7	10501.1	803.439	7132.42	3166.68
